# Supplementary material
Source: Springer Nature journal article supplement (https://www.springermedizin.de/resource/supplementary/12933_2010_292_MOESM3_ESM.pdf/9540030)

**A**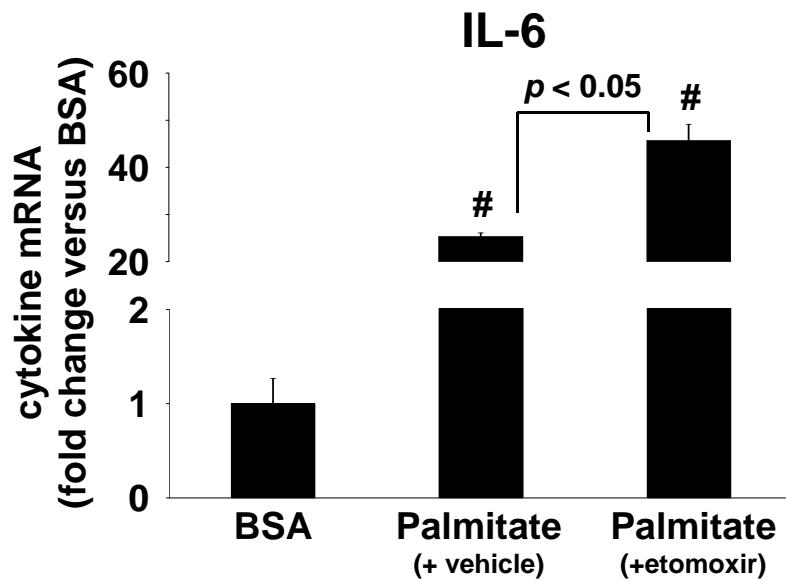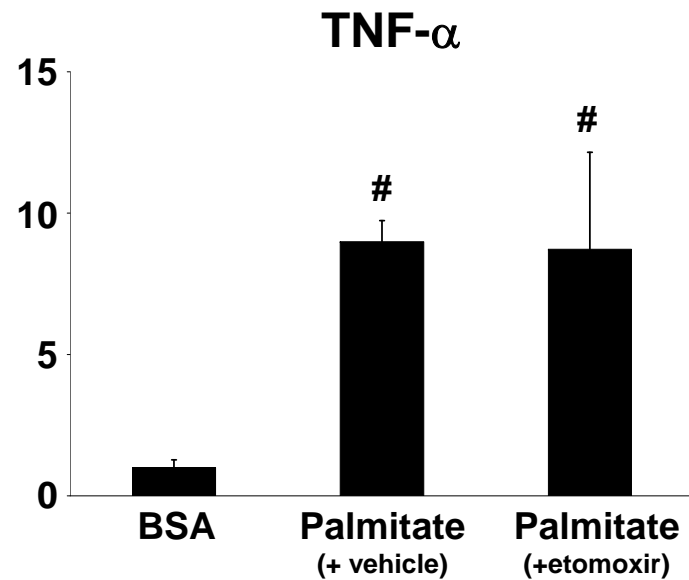**B**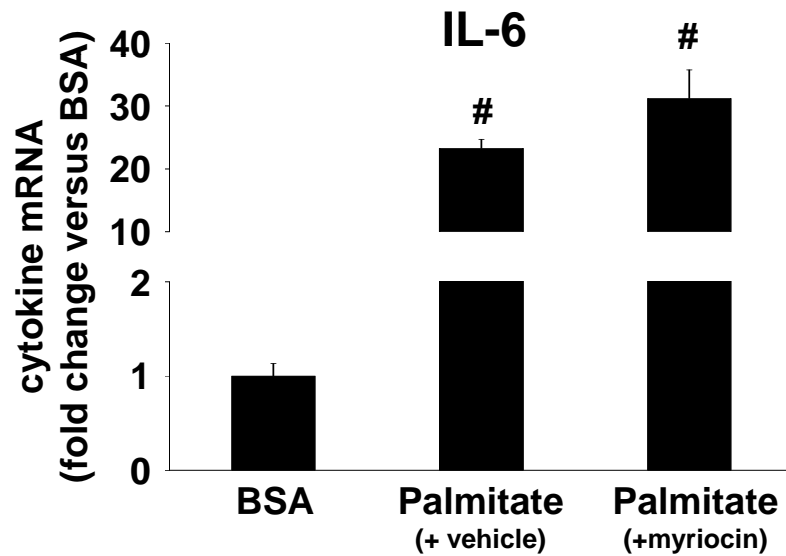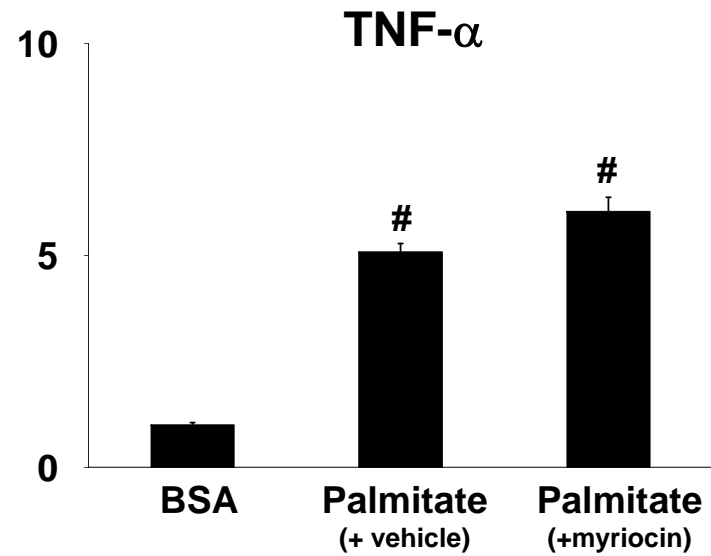

Supplement: MOESM3 [file 9540030]
